# Supplementary material for: Anaerobic Fungal Mevalonate Pathway Genomic Biases Lead to Heterologous Toxicity Underpredicted by Codon Adaptation Indices
Source: MDPI journal article supplement (doi:10.3390/microorganisms9091986), 2021-09-18
Supplement: s1 [file s1]

## SUPPLEMENTAL INFORMATION FOR

# Genomic biases in the anaerobic fungal mevalonate pathway lead to heterologous toxicity underpredicted by codon adaptation indices

Ethan T. Hillman<sup>1,2</sup>, Elizabeth Frazier<sup>1</sup>, Evan Shank<sup>3</sup>, Adrian Ortiz-Velez<sup>1‡</sup>, Jacob Englaender<sup>1†</sup>, and Kevin Solomon<sup>1,2‡\*</sup>

<sup>1</sup> Department of Agricultural and Biological Engineering, Purdue University, West Lafayette, IN 47906, USA

<sup>2</sup> Purdue University Interdisciplinary Life Sciences, Purdue University, West Lafayette, IN 47906, USA

<sup>3</sup> Department of Biological Sciences, Purdue University, West Lafayette, IN 47906, USA

‡ Present Address: Department of Biology, San Diego State University, San Diego, CA 92182, USA

† Current Address: Agrospheres, INC., Charlottesville, VA 22901, USA

‡ Present address: Department of Chemical & Biomolecular Engineering, University of Delaware, Newark, DE 19716

\* Correspondence: [kvs@udel.edu](mailto:kvs@udel.edu)

### Table of contents:

- Tables S1–S3—Codon Tables of *P. indiana*, *E. coli*, and *S. cerevisiae*
- Figure S1—SDS-PAGE analysis of mevalonate homologs
- Figure S2—Growth OD600 of 50 ml cultures containing various mevalonate pathways after 20 hours of growth
- Figure S3—Mevalonate and acetate titers of original and hybrid mevalonate pathways at 5ml scale
- Tables S4-7—Strains, oligos, plasmids, and gene sequences used in this study

Table S1 – Codon usage table for anaerobic fungus *Piromyces sp. UH3-1*. %Usage represents overall usage of the codon relative to the total of all codons used for all genes (coding sequences, CDS). Ratio = relative usage based on the frequency that a codon is used for the related amino acid.

|   | CODON | AMINO ACID | % USAGE | RATIO | CODON | AMINO ACID | % USAGE | RATIO | CODON | AMINO ACID | % USAGE | RATIO | CODON | AMINO ACID | % USAGE | RATIO |   |
|---|-------|------------|---------|-------|-------|------------|---------|-------|-------|------------|---------|-------|-------|------------|---------|-------|---|
| U | UUU   | Phe (F)    | 3.0%    | 0.71  | UCU   | Ser (S)    | 2.3%    | 0.28  | UAU   | Tyr (Y)    | 3.8%    | 0.82  | UGU   | Cys (C)    | 1.4%    | 0.86  | U |
|   | UUC   | Phe (F)    | 1.1%    | 0.29  | UCC   | Ser (S)    | 0.7%    | 0.08  | UAC   | Tyr (Y)    | 0.8%    | 0.18  | UGC   | Cys (C)    | 0.2%    | 0.14  | C |
|   | UUA   | Leu (L)    | 4.9%    | 0.60  | UCA   | Ser (S)    | 2.6%    | 0.30  | UAA   | STOP       | 0.1%    | 0.80  | UGA   | STOP       | 0.0%    | 0.09  | A |
|   | UUG   | Leu (L)    | 0.7%    | 0.09  | UCG   | Ser (S)    | 0.2%    | 0.03  | UAG   | STOP       | 0.0%    | 0.11  | UGG   | Trp (W)    | 0.8%    | 1.00  | G |
| C | CUU   | Leu (L)    | 1.7%    | 0.22  | CCU   | Pro (P)    | 0.9%    | 0.27  | CAU   | His (H)    | 1.4%    | 0.86  | CGU   | Arg (R)    | 0.8%    | 0.26  | U |
|   | CUC   | Leu (L)    | 0.2%    | 0.03  | CCC   | Pro (P)    | 0.1%    | 0.05  | CAC   | His (H)    | 0.2%    | 0.14  | CGC   | Arg (R)    | 0.0%    | 0.01  | C |
|   | CUA   | Leu (L)    | 0.4%    | 0.05  | CCA   | Pro (P)    | 2.3%    | 0.65  | CAA   | Gln (Q)    | 3.0%    | 0.91  | CGA   | Arg (R)    | 0.2%    | 0.06  | A |
|   | CUG   | Leu (L)    | 0.1%    | 0.01  | CCG   | Pro (P)    | 0.1%    | 0.03  | CAG   | Gln (Q)    | 0.3%    | 0.09  | CGG   | Arg (R)    | 0.0%    | 0.01  | G |
| A | AUU   | Ile (I)    | 5.4%    | 0.62  | ACU   | Thr (T)    | 2.6%    | 0.48  | AAU   | Asn (N)    | 9.0%    | 0.88  | AGU   | Ser (S)    | 2.3%    | 0.27  | U |
|   | AUC   | Ile (I)    | 0.7%    | 0.09  | ACC   | Thr (T)    | 0.8%    | 0.15  | AAC   | Asn (N)    | 1.3%    | 0.12  | AGC   | Ser (S)    | 0.3%    | 0.03  | C |
|   | AUA   | Ile (I)    | 2.7%    | 0.29  | ACA   | Thr (T)    | 1.8%    | 0.32  | AAA   | Lys (K)    | 7.0%    | 0.75  | AGA   | Arg (R)    | 1.9%    | 0.60  | A |
|   | AUG   | Met (M)    | 2.0%    | 1.00  | ACG   | Thr (T)    | 0.2%    | 0.05  | AAG   | Lys (K)    | 2.0%    | 0.25  | AGG   | Arg (R)    | 0.2%    | 0.06  | G |
| G | GUU   | Val (V)    | 2.6%    | 0.57  | GCU   | Ala (A)    | 2.1%    | 0.55  | GAU   | Asp (D)    | 5.3%    | 0.90  | GGU   | Gly (G)    | 2.4%    | 0.58  | U |
|   | GUC   | Val (V)    | 0.4%    | 0.09  | GCC   | Ala (A)    | 0.5%    | 0.14  | GAC   | Asp (D)    | 0.6%    | 0.10  | GGC   | Gly (G)    | 0.2%    | 0.05  | C |
|   | GUA   | Val (V)    | 1.3%    | 0.28  | GCA   | Ala (A)    | 1.1%    | 0.28  | GAA   | Glu (E)    | 6.7%    | 0.91  | GGA   | Gly (G)    | 1.4%    | 0.34  | A |
|   | GUG   | Val (V)    | 0.2%    | 0.06  | GCG   | Ala (A)    | 0.1%    | 0.03  | GAG   | Glu (E)    | 0.5%    | 0.09  | GGG   | Gly (G)    | 0.1%    | 0.03  | G |
|   | U     |            |         |       | C     |            |         |       | A     |            |         |       | G     |            |         |       |   |

Table S2 – Codon usage table for *E. coli*. %Usage represents overall usage of the codon relative to the total of all codons used for all genes (coding sequences, CDS). Ratio = relative usage based on the frequency that a codon is used for the related amino acid.

|   | CODON | AMINO ACID | % USAGE | RATIO | CODON | AMINO ACID | % USAGE | RATIO | CODON | AMINO ACID | % USAGE | RATIO | CODON | AMINO ACID | % USAGE | RATIO |   |
|---|-------|------------|---------|-------|-------|------------|---------|-------|-------|------------|---------|-------|-------|------------|---------|-------|---|
| U | UUU   | Phe (F)    | 1.9%    | 0.51  | UCU   | Ser (S)    | 1.1%    | 0.19  | UAU   | Tyr (Y)    | 1.6%    | 0.53  | UGU   | Cys (C)    | 0.4%    | 0.43  | U |
|   | UUC   | Phe (F)    | 1.8%    | 0.49  | UCC   | Ser (S)    | 1.0%    | 0.17  | UAC   | Tyr (Y)    | 1.4%    | 0.47  | UGC   | Cys (C)    | 0.6%    | 0.57  | C |
|   | UUA   | Leu (L)    | 1.0%    | 0.11  | UCA   | Ser (S)    | 0.7%    | 0.12  | UAA   | STOP       | 0.2%    | 0.62  | UGA   | STOP       | 0.1%    | 0.30  | A |
|   | UUG   | Leu (L)    | 1.1%    | 0.11  | UCG   | Ser (S)    | 0.8%    | 0.13  | UAG   | STOP       | 0.03%   | 0.09  | UGG   | Trp (W)    | 1.4%    | 1.00  | G |
| C | CUU   | Leu (L)    | 1.0%    | 0.10  | CCU   | Pro (P)    | 0.7%    | 0.16  | CAU   | His (H)    | 1.2%    | 0.52  | CGU   | Arg (R)    | 2.4%    | 0.42  | U |
|   | CUC   | Leu (L)    | 0.9%    | 0.10  | CCC   | Pro (P)    | 0.4%    | 0.10  | CAC   | His (H)    | 1.1%    | 0.48  | CGC   | Arg (R)    | 2.2%    | 0.37  | C |
|   | CUA   | Leu (L)    | 0.3%    | 0.03  | CCA   | Pro (P)    | 0.8%    | 0.20  | CAA   | Gln (Q)    | 1.3%    | 0.31  | CGA   | Arg (R)    | 0.3%    | 0.05  | A |
|   | CUG   | Leu (L)    | 5.2%    | 0.55  | CCG   | Pro (P)    | 2.4%    | 0.55  | CAG   | Gln (Q)    | 2.9%    | 0.69  | CGG   | Arg (R)    | 0.5%    | 0.08  | G |
| A | AUU   | Ile (I)    | 2.7%    | 0.47  | ACU   | Thr (T)    | 1.2%    | 0.21  | AAU   | Asn (N)    | 1.6%    | 0.39  | AGU   | Ser (S)    | 0.7%    | 0.13  | U |
|   | AUC   | Ile (I)    | 2.7%    | 0.46  | ACC   | Thr (T)    | 1.6%    | 0.43  | AAC   | Asn (N)    | 2.6%    | 0.61  | AGC   | Ser (S)    | 1.5%    | 0.27  | C |
|   | AUA   | Ile (I)    | 0.4%    | 0.07  | ACA   | Thr (T)    | 1.4%    | 0.30  | AAA   | Lys (K)    | 3.8%    | 0.76  | AGA   | Arg (R)    | 0.2%    | 0.04  | A |
|   | AUG   | Met (M)    | 2.6%    | 1.00  | ACG   | Thr (T)    | 1.3%    | 0.23  | AAG   | Lys (K)    | 1.2%    | 0.24  | AGG   | Arg (R)    | 0.2%    | 0.03  | G |
| G | GUU   | Val (V)    | 2.0%    | 0.29  | GCU   | Ala (A)    | 1.8%    | 0.19  | GAU   | Asp (D)    | 3.3%    | 0.59  | GGU   | Gly (G)    | 2.8%    | 0.38  | U |
|   | GUC   | Val (V)    | 1.4%    | 0.20  | GCC   | Ala (A)    | 2.3%    | 0.25  | GAC   | Asp (D)    | 2.3%    | 0.41  | GGC   | Gly (G)    | 3.0%    | 0.40  | C |
|   | GUA   | Val (V)    | 1.2%    | 0.17  | GCA   | Ala (A)    | 2.1%    | 0.22  | GAA   | Glu (E)    | 4.4%    | 0.70  | GGA   | Gly (G)    | 0.7%    | 0.09  | A |
|   | GUG   | Val (V)    | 2.4%    | 0.34  | GCG   | Ala (A)    | 3.2%    | 0.34  | GAG   | Glu (E)    | 1.9%    | 0.30  | GGG   | Gly (G)    | 0.9%    | 0.13  | G |
|   | U     |            |         |       | C     |            |         |       | A     |            |         |       | G     |            |         |       |   |

Table S3 – Codon usage table for *S. cerevisiae*. %Usage represents overall usage of the codon relative to the total of all codons used for all genes (coding sequences, CDS). Ratio = relative usage based on the frequency that a codon is used for the related amino acid.

|   | CODON | AMINO ACID | % USAGE | RATIO | CODON | AMINO ACID | % USAGE | RATIO | CODON | AMINO ACID | % USAGE | RATIO | CODON | AMINO ACID | % USAGE | RATIO |   |
|---|-------|------------|---------|-------|-------|------------|---------|-------|-------|------------|---------|-------|-------|------------|---------|-------|---|
| U | UUU   | Phe (F)    | 2.6%    | 0.59  | UCU   | Ser (S)    | 2.3%    | 0.26  | UAU   | Tyr (Y)    | 1.9%    | 0.56  | UGU   | Cys (C)    | 0.8%    | 0.63  | U |
|   | UUC   | Phe (F)    | 1.8%    | 0.41  | UCC   | Ser (S)    | 1.4%    | 0.16  | UAC   | Tyr (Y)    | 1.5%    | 0.44  | UGC   | Cys (C)    | 0.5%    | 0.37  | C |
|   | UUA   | Leu (L)    | 2.6%    | 0.28  | UCA   | Ser (S)    | 1.9%    | 0.21  | UAA   | STOP       | 0.1%    | 0.47  | UGA   | STOP       | 0.1%    | 0.30  | A |
|   | UUG   | Leu (L)    | 2.7%    | 0.29  | UCG   | Ser (S)    | 0.9%    | 0.10  | UAG   | STOP       | 0.05%   | 0.23  | UGG   | Trp (W)    | 1.0%    | 1.00  | G |
| C | CUU   | Leu (L)    | 1.2%    | 0.13  | CCU   | Pro (P)    | 1.4%    | 0.31  | CAU   | His (H)    | 1.4%    | 0.64  | CGU   | Arg (R)    | 0.6%    | 0.14  | U |
|   | CUC   | Leu (L)    | 0.5%    | 0.06  | CCC   | Pro (P)    | 0.7%    | 0.15  | CAC   | His (H)    | 0.8%    | 0.36  | CGC   | Arg (R)    | 0.3%    | 0.06  | C |
|   | CUA   | Leu (L)    | 1.3%    | 0.14  | CCA   | Pro (P)    | 1.8%    | 0.42  | CAA   | Gln (Q)    | 2.7%    | 0.69  | CGA   | Arg (R)    | 0.3%    | 0.07  | A |
|   | CUG   | Leu (L)    | 1.0%    | 0.11  | CCG   | Pro (P)    | 0.5%    | 0.12  | CAG   | Gln (Q)    | 1.2%    | 0.31  | CGG   | Arg (R)    | 0.2%    | 0.04  | G |
| A | AUU   | Ile (I)    | 3.0%    | 0.46  | ACU   | Thr (T)    | 2.0%    | 0.35  | AAU   | Asn (N)    | 3.6%    | 0.59  | AGU   | Ser (S)    | 1.4%    | 0.16  | U |
|   | AUC   | Ile (I)    | 1.7%    | 0.26  | ACC   | Thr (T)    | 1.3%    | 0.22  | AAC   | Asn (N)    | 2.5%    | 0.41  | AGC   | Ser (S)    | 1.0%    | 0.11  | C |
|   | AUA   | Ile (I)    | 1.8%    | 0.27  | ACA   | Thr (T)    | 1.8%    | 0.30  | AAA   | Lys (K)    | 4.2%    | 0.58  | AGA   | Arg (R)    | 2.1%    | 0.48  | A |
|   | AUG   | Met (M)    | 2.1%    | 1.00  | ACG   | Thr (T)    | 0.8%    | 0.14  | AAG   | Lys (K)    | 3.1%    | 0.42  | AGG   | Arg (R)    | 0.9%    | 0.21  | G |
| G | GUU   | Val (V)    | 2.2%    | 0.39  | GCU   | Ala (A)    | 2.1%    | 0.38  | GAU   | Asp (D)    | 3.8%    | 0.65  | GGU   | Gly (G)    | 2.4%    | 0.47  | U |
|   | GUC   | Val (V)    | 1.2%    | 0.21  | GCC   | Ala (A)    | 1.3%    | 0.22  | GAC   | Asp (D)    | 2.0%    | 0.16  | GGC   | Gly (G)    | 1.0%    | 0.19  | C |
|   | GUA   | Val (V)    | 1.2%    | 0.21  | GCA   | Ala (A)    | 1.6%    | 0.29  | GAA   | Glu (E)    | 4.6%    | 0.70  | GGA   | Gly (G)    | 1.1%    | 0.22  | A |
|   | GUG   | Val (V)    | 1.1%    | 0.19  | GCG   | Ala (A)    | 0.6%    | 0.11  | GAG   | Glu (E)    | 1.9%    | 0.30  | GGG   | Gly (G)    | 0.6%    | 0.12  | G |
|   | U     |            |         |       | C     |            |         |       | A     |            |         |       | G     |            |         |       |   |

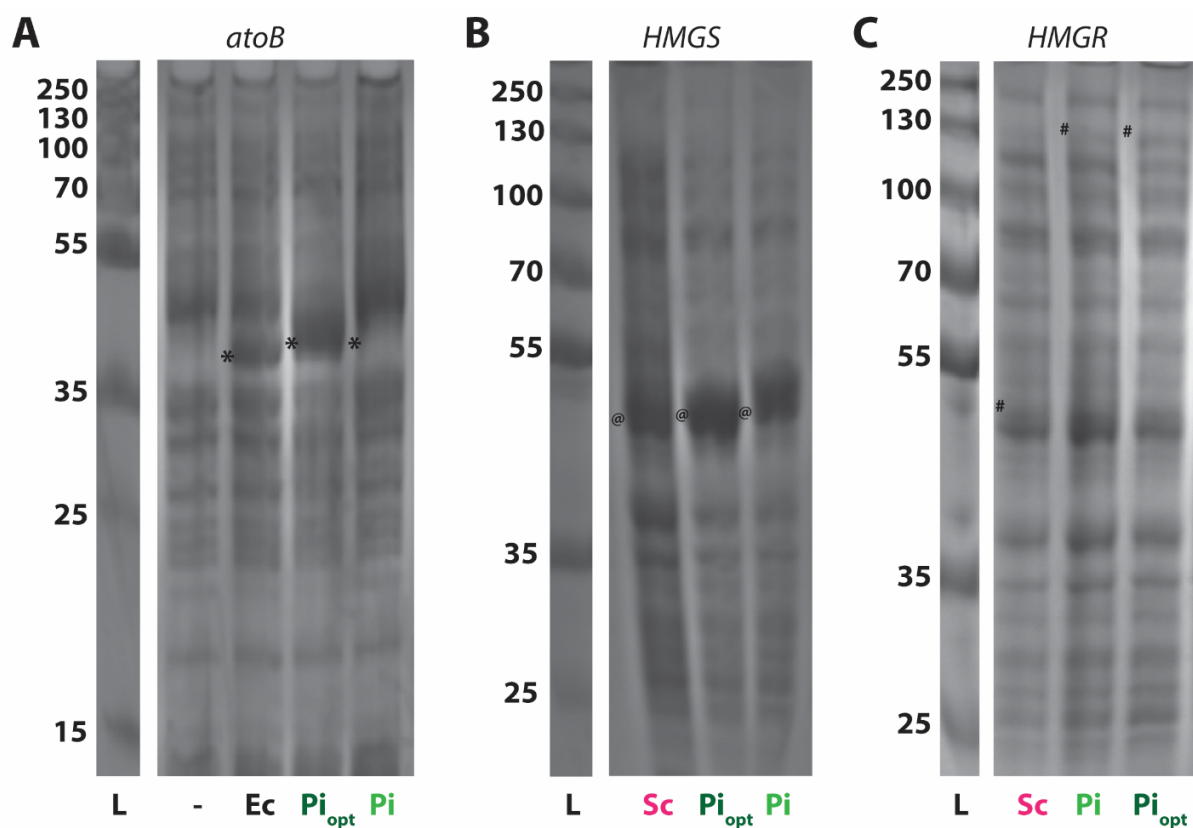

Figure S1 – SDS-PAGE analysis of mevalonate homologs. A) *atoB*, B) *HMGS*, and C) *HMGR* homologs from *E. coli* (Ec), *S. cerevisiae* (Sc), *P. indiana* (Pi) and the *E. coli*-optimized *P. indiana* (Pi<sub>opt</sub>) gene; \* shows the expected sizes/location of the Ec and Pi *atoB* homologs (40.3 and 43.9 kDa, respectively), @ shows the expected sizes/location of the Sc and Pi *HMGS* homologs (51.5 and 52.3 kDa, respectively), and # show the expected sizes/location of the Sc and Pi *HMGR* homologs (53.1 and 112.1 kDa, respectively). L indicates the Page Ruler PLUS ladder and “-” indicates the *E. coli* host control with an uninduced vector. Whole cell lysates of actively growing cultures were analyzed ~ 2 hours after induction and loading was relativized to OD<sub>600</sub>.

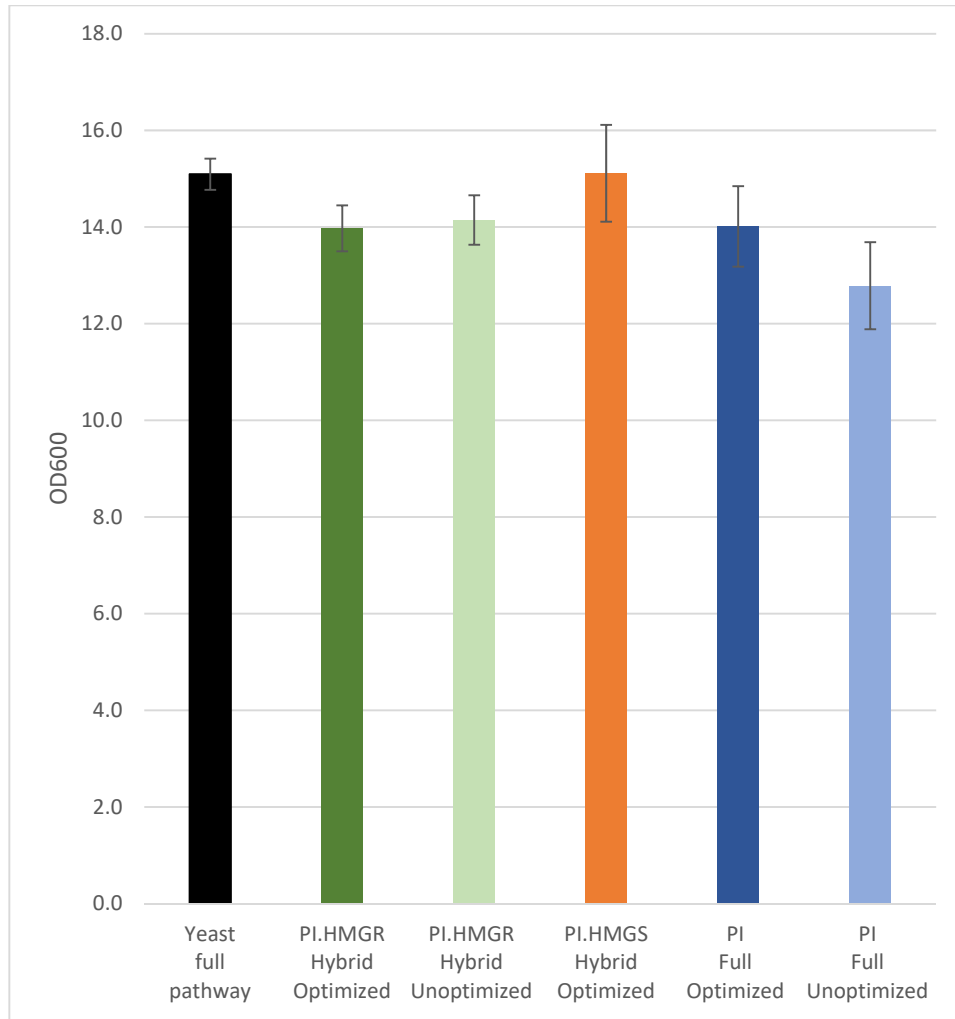

Figure S2: OD of 50 ml cultures containing various mevalonate pathways after 20 hours of growth. Yeast pathway = the *S. cerevisiae* from Martin et al [236]. Full PI pathways = genes from *P. indiana* (Figure 3B) either native or optimized for *E. coli*. Hybrid pathways use the yeast construct and swap the indicated gene for the original yeast homolog. All pathways evaluated with *atoB<sub>H9</sub>-HMGS<sub>C4</sub>-HMGR<sub>H9</sub>* promoter organization. Error bars = standard deviation.

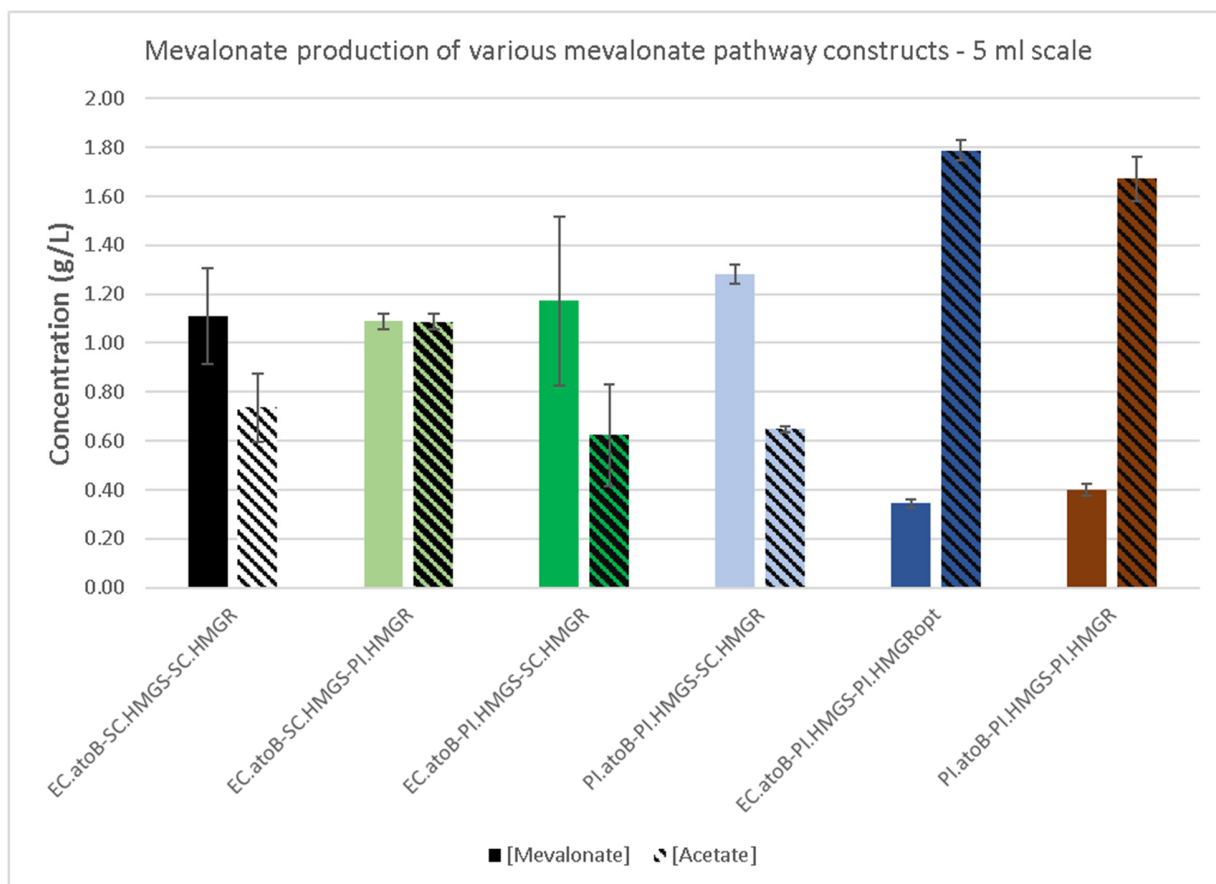

Figure S3: Mevalonate and acetate titers of original and hybrid mevalonate pathways at 5 ml scale. Mevalonate production (solid) and acetate accumulation (striped) from various mevalonate pathway hybrids containing Martin et al (black) or *E. coli*-codon-optimized *P. indiana* genes (various colors, see Figure 6-7) after 20 hrs of culture. All pathways are configured in the high-producing h9-promoter configuration. Errors bars represent standard deviation.

Table S4 – Oligos used in this study

| <b>Name</b>        | <b>Sequence 5'→3'</b>                                                 | <b>Purpose</b>                                                                 |
|--------------------|-----------------------------------------------------------------------|--------------------------------------------------------------------------------|
| 2.3.1.9_FWD_XhoI   | TGGT <u>ctcgag</u> <b>ATG</b> ACTCTTCAAAAAGATGTTTACATTGTTTCCGC        | pETM6-Pi.atoB construction                                                     |
| 2.3.1.9_Rev_BcuI   | TGGT <u>actagt</u> <u>cccggg</u> yTAAAGAACTTCAATAACGACAGATGAGGC       |                                                                                |
| 2.3.3.10_fwd_XmaI  | TGGT <u>ctcgag</u> <u>cccggg</u> <b>ATGA</b> ArGCTAATAAAyrTTGGTATTGTT | pETM6-Pi.HMGS construction                                                     |
| 2.3.3.10_REV_NotI  | TGGT <u>actagt</u> <u>gcccgc</u> cTTATTGrTATmTTTCATArGTTCTrCG         |                                                                                |
| 1.1.1.88_fwd-BglII | TGGT <u>agatctc</u> <b>ATG</b> ATGACGACAGTACCwATAGAAG                 | pETM6-Pi.HMGR construction                                                     |
| 1.1.1.88_rev-XhoI  | TGGT <u>ctcgag</u> TTAAGTATTTTCGAGAACGTCCTTTGAG                       |                                                                                |
| M13F               | TGTAAAACGACGGCCAGT                                                    | pETM6-Pi.atob, HMGS, & HMGR<br>opt<br>gBLOCK amplification for<br>construction |
| M13R               | CAGGAAACAGCTATGAC                                                     |                                                                                |
| T7_pro_seq         | <u>gtgatgtcggcgatatagg</u>                                            | Promoter Sequencing primer                                                     |

Start sites bolded, Restrictions sites underlined

Table S5 – *E. coli* strains used in this study

| <b>Name</b> | <b>Relevant genotype</b>                                                                                         | <b>Source</b> |
|-------------|------------------------------------------------------------------------------------------------------------------|---------------|
| DH5a        | F– endA1 glnV44 thi-1 recA1 relA1 gyrA96 deoR nupG purB20<br>φ80dlacZΔM15 Δ(lacZYA-argF)U169, hsdR17(rK–mK+), λ– | ThermoFisher  |
| BL21        | F– ompT gal dcm lon hsdSB(rB–mB–) λ(DE3 [lacI lacUV5-<br>T7p07 ind1 sam7 nin5]) [malB+]K-12(λS)                  | Invitrogen    |



|                           |                                                                                                                   |                         |
|---------------------------|-------------------------------------------------------------------------------------------------------------------|-------------------------|
| BL21<br>CodonPlus<br>RIPL | F- ompT hsdS(rB – mB – ) dcm+ Tetr gal $\lambda$ (DE3) endA Hte<br>[argU proL Camr ] [argU ileY leuW Strep/Spectr | Agilent<br>Technologies |
|---------------------------|-------------------------------------------------------------------------------------------------------------------|-------------------------|

Table S6 – Gene sequences used in this study.

| <b>Sc.atoB* Silent mutation of NdeI for pETM6 subcloning</b>                                                                                                                                                                                                                                                                                                                                                                                                                                                                                                                                                                                                                                                                                                                                                                                                                                                                                                                                                                                                                                                                                                                                                                                                                                                 |
|--------------------------------------------------------------------------------------------------------------------------------------------------------------------------------------------------------------------------------------------------------------------------------------------------------------------------------------------------------------------------------------------------------------------------------------------------------------------------------------------------------------------------------------------------------------------------------------------------------------------------------------------------------------------------------------------------------------------------------------------------------------------------------------------------------------------------------------------------------------------------------------------------------------------------------------------------------------------------------------------------------------------------------------------------------------------------------------------------------------------------------------------------------------------------------------------------------------------------------------------------------------------------------------------------------------|
| ATGAAAAATTGTGTCATCGTCAGTGCGGTACGTACTGCTATCGGTAGTTTTAACGGTT<br>CACTCGCTTCCACCAGCGCCATCGACCTGGGGGCGACAGTAATTAAGCCGCCATTG<br>AACGTGCAAAAATCGATTCACAACACGTTGATGAAGTGATTATGGGTAACTGTTAC<br>AAGCCGGGCTGGGGCAAAATCCGGCGCGTCAGGCACTGTTAAAAAGCGGGCTGGCA<br>GAAACGGTGTGCGGATTCACGGTCAATAAAGTATGTGGTTCGGGTCTTAAAAGTGTG<br>GCGCTTGCCGCCAGGCCATTCAGGCAGGTCAGGCGCAGAGCATTGTGGCGGGGGGT<br>ATGGAAAATATGAGTTTAGCCCCCTACTTACTCGATGCAAAAGCACGCTCTGGTTATC<br>GTCTTGAGACGGACAGGTTTATGACGTAATCCTGCGCGATGGCCTGATGTGCGCCA<br>CCCATGGTTATCACATGGGGATTACCGCCGAAAACGTGGCTAAAGAGTACGGAATTA<br>CCCGTGAAATGCAGGATGAACTGGCGCTACATTCACAGCGTAAAGCGGCAGCCGCA<br>ATTGAGTCCGGTGCTTTTACAGCCGAAATCGTCCCGGTAAATGTTGTCACTCGAAAGA<br>AAACCTTCGTCTTCAGTCAAGACGAATTCCCGAAAGCGAATTCAACGGCTGAAGCGT<br>TAGGTGCATTGCGCCCGGCCTTCGATAAAGCAGGAACAGTCACCGCTGGGAACGCGT<br>CTGGTATTAACGACGGTGCTGCCGCTCTGGTGATTATGGAAGAATCTGCGGCGCTGGC<br>AGCAGGCCTTACCCCCCTGGCTCGCATTAAAAGTTATGCCAGCGGTGGCGTGCCCCC<br>CGCATTGATGGGTATGGGGCCAGTACCTGCCACGCAAAAAGCGTTACAACCTGGCGGG<br>GCTGCAACTGGCGGATATTGATCTCATTGAGGCTAATGAAGCATTGCTGCACAGTTC<br>CTTGCCGTGGGAAAAACCTGGGCTTTGATTCTGAGAAAGTGAATGTCAACGGCGGG<br>GCCATCGCGCTCGGGCATCCTATCGGTGCCAGTGGTGCTCGTATTCTGGTCACACTAT<br>TACATGCCATGCAGGCACGCGATAAAACGCTGGGGCTGGCAACACTGTGCATTGGCG<br>GCGGTCAGGGAATTGCGATGGTGATTGAACGGTTGAATTAA |
| <b>Sc.HMGS</b>                                                                                                                                                                                                                                                                                                                                                                                                                                                                                                                                                                                                                                                                                                                                                                                                                                                                                                                                                                                                                                                                                                                                                                                                                                                                                               |
| ATGACTGAACTAAAAAAACAAAAGACCGCTGAACAAAAAACAGACCTCAAAATGT<br>CGGTATTAAGGTATCCAAATTTACATCCCAACTCAATGTGTCAACCAATCTGAGCTA<br>GAGAAATTTGATGGCGTTTCTCAAGGTAAATACACAATTGGTCTGGGCCAAACCAAC<br>ATGTCTTTTGTCAATGACAGAGAAGATATCTACTCGATGTCCCTAACTGTTTTGTCTAA<br>GTTGATCAAGAGTTACAACATCGACACCAACAAAATTGGTAGATTAGAAGTCGGTAC<br>TGAAACTCTGATTGACAAGTCCAAGTCTGTCAAGTCTGTCTTGATGCAATTGTTTGGT<br>GAAAACACTGACGTCGAAGGTATTGACACGCTTAATGCCTGTTACGGTGGTACCAAC<br>GCGTTGTTCAACTCTTTGAACTGGATTGAATCTAACGCATGGGATGGTAGAGACGCCA<br>TTGTAGTTTGCGGTGATATTGCCATCTACGATAAGGGTGCCGCAAGACCAACCGGTG<br>GTGCCGGTACTGTTGCTATGTGGATCGGTCCTGATGCTCCAATTGTATTTGACTCTGTA<br>AGAGCTTCTTACATGGAACACGCCTACGATTTTTACAAGCCAGATTTACCAGCGAAT<br>ATCCTTACGTCGATGGTCATTTTTTATTAACTTGTTACGTCAAGGCTCTTGATCAAGTT<br>TACAAGAGTTATTCCAAGAAGGCTATTTCTAAAGGGTTGGTTAGCGATCCCGCTGGTT<br>CGGATGCTTTGAACGTTTTGAAATATTTGACTACAACGTTTTCCATGTTCCAACCTGT<br>AAATTGGTCACAAAATCATACGGTAGATTACTATATAACGATTTTACAGAGCCAATCCT<br>CAATTGTTCCAGAAAGTTGACGCCGAATTAGCTACTCGCGATTATGACGAATCTTTAA<br>CCGATAAGAACATTGAAAAAACTTTTGTTAATGTTGCTAAGCCATTCCACAAAGAGA<br>GAGTTGCCCAATCTTTGATTGTTCCAACAAACACAGGTAACATGTACACCGCATCTGT                                                                                                                                                           |

TTATGCCGCCTTTGCATCTCTATTAAACTATGTTGGATCTGACGACTTACAAGGCAAG  
CGTGTTGGTTTATTTTCTTACGGTTCCGGTTTAGCTGCATCTCTATATTCTTGCAAAATT  
GTTGGTGACGTCCAACATATTATCAAGGAATTAGATATTACTAACAAATTAGCCAAG  
AGAATCACCGAAACTCCAAAGGATTACGAAGCTGCCATCGAATTGAGAGAAAATGC  
CCATTTGAAGAAGAAGCTTCAAACCTCAAGGTTCCATTGAGCATTTGCAAAGTGGTGTT  
TACTACTTGACCAACATCGATGACAAATTTAGAAGATCTTACGATGTTAAAAAATAA

**Sc.HMGR\* - Silent mutation of NdeI for pETM6 subcloning**

ATGGTTTTAACCAATAAAACAGTCATTTCTGGATCGAAAGTCAAAAGTTTATCATCTG  
CGCAATCGAGCTCATCAGGACCTTCATCATCTAGTGAGGAAGATGATTCCCGCGATA  
TTGAAAGCTTGGATAAGAAAATACGTCCTTTAGAAGAATTAGAAGCATTATTAAGTA  
GTGGAAATACAAAACAATTGAAGAACAAAGAGGTGCTGCCTTGGTTATTCACGGTA  
AGTTACCTTTGTACGCTTTGGAGAAAAAATTAGGTGATACTACGAGAGCGGTTGCGGT  
ACGTAGGAAGGCTCTTTCAATTTTGGCAGAAGCTCCTGTATTAGCATCTGATCGTTTA  
CCATATAAAAATTATGACTACGACCGCGTATTTGGCGCTTGTGTGAAAATGTTATAG  
GTTACATGCCTTTGCCCCGTTGGTGTTATAGGCCCTTGGTTATCGATGGTACATCTTAT  
CATATACCAATGGCAACTACAGAGGGTTGTTTGGTAGCTTCTGCCATGCGTGGCTGTA  
AGGCAATCAATGCTGGCGGTGGTGCAACAACCTGTTTTAACTAAGGATGGTATGACAA  
GAGGCCCAGTAGTCCGTTTCCCAACTTTGAAAAGATCTGGTGCCTGTAAGATATGGTT  
AGACTCAGAAGAGGGGACAAAACGCAATTAAAAAAGCTTTTAACTCTACATCAAGAT  
TTGCACGTCTGCAACATATTCAAACCTGTCTAGCAGGAGATTTACTCTTCATGAGATTT  
AGAACAACACTACTGGTGACGCAATGGGTATGAATATGATTTCTAAAGGTGTCGAATAC  
TCATTAAAGCAAATGGTAGAAGAGTATGGCTGGGAAGATATGGAGGTTGTCTCCGTT  
TCTGGTAACTACTGTACCGACAAAAAACCAGCTGCCATCAACTGGATCGAAGGTCGT  
GGTAAGAGTGTGCTCGCAGAAGCTACTATTCCTGGTGATGTTGTCAGAAAAGTGTTAA  
AAAGTGATGTTTCCGCATTGGTTGAGTTGAACATTGCTAAGAATTTGGTTGGATCTGC  
AATGGCTGGGTCTGTTGGTGGATTAAACGCACATGCAGCTAATTTAGTGACAGCTGTT  
TTCTTGGCATTAGGACAAGATCCTGCACAAAATGTTGAAAGTTCCAACCTGTATAACAT  
TGATGAAAGAAGTGGACGGTGATTTGAGAATTTCCGTATCCATGCCATCCATCGAAG  
TAGGTACCATCGGTGGTGGTACTGTTCTAGAACCACAAGGTGCCATGTTGGACTTATT  
AGGTGTAAGAGGCCCCGCATGCTACCGCTCCTGGTACCAACGCACGTCAATTAGCAAG  
AATAGTTGCCTGTGCCGTCTTGGCAGGTGAATTATCCTTATGTGCTGCCCTAGCAGCC  
GGCCATTTGGTTCAAAGTCACATGACCCACAACAGGAAACCTGCTGAACCAACAAA  
ACCTAACAATTTGGACGCCACTGATATAAATCGTTTGAAAGATGGGTCCGTCACCTGC  
ATTAAATCCTAA

**Pi.atoB**

ATGACTCTTCAAAAAGATGTTTACATTGTTTCCGCTGTTTCGTA CTCCAATTGGTGGTTT  
AAGTGGTTCTTTAGCTCAATTTAGTGCTACTCAACTTGGTAGCATTGCTATCAAAGGT  
GCTTTAGAAAAGGCCAATGTTAAGCCAGAAGAAGTTCAAGAAGTATTCTTCGGAAAT  
GTTTTAACTGCTAACCTTGGTCAAAACCCAGCTCGTCAAGCTGCTTTAGGTGCTGGTA  
TTCCAAACACTGTTGTTTGTACCACTGTTAACAAGGTTTGTGCTTCCGCTATGAAGGCC  
ACTATTCTTGGTGCTCAAACCTATTATTTTAGGTGAAAATGATTTAGTTGTTGTAGGTGG  
ACAAGAATCTATGACTAACAACCTCCATACTACATTCCAAAAGCTAGAGCTGGTTGTCTG  
TTACGGTAACCAACAAATTGTTGATGGTATCATTCAAGATGGTCTTTACGATGTTTAC

AACCAATATCAAATGGGTGTTGCTGCTGATGCTACTGCTGCTGAATACAATATCACTA  
GAAATGATCAAGATGATTTTCGCTATTAGAAGTTACAAACTTTCCCAAGAATCCAATG  
CTAACGGTTATGTTGTTCGATGAAATTATTCCAGTTGAAATTCCAGCCACTAAGAGAAC  
CCCAGCTTCTACTGTTACTACTGATGATGAAATTAACCATCTTAATGAAGCCAAGTTA  
AGAGCTGTTAGACCAGCTTTCGTCACTGATGGTACTGTTACTGCTCCAAATGCTTCTA  
CTATTAGTGATGGTGCTGCTGCTCTTGTCTTAGCTTCTAAGGAAAAGGTTGAAGCTTTA  
GGTTTAAAGCCAATTGCTAAGATTATCGGTTGGGGTGATGCTGCTCATGATCCAGCTC  
ACTTCACTACTGCTCCATCTTTAGCTATTCCAAAGGCTTTAAAGCATGCTAACAAAAC  
TCAAGATGAAATTGATTTCTTTGAAATTAATGAAGCTTTCGCTGTTGTTTCCCTTGTTA  
ACAGTAAGATTTTAAATATTCCAATTGAAAAATTAAATGTCTTTGGTGGTGCTTGTAG  
TATGGGTCACCCACTTGGTTGTTCCGGTGCTAGAATTATTGTTACTTTAATCAATGTCT  
TAAAGAAGAAGGGTGGTAAGCTTGGTTGTGCTGCTATCTGTAATGGTGGTGGTGGTGC  
CTCATCTGTCGTTATTGAAGTTCTTAACCCGGACTAG

#### **Pi.HMGS**

ATGAAGGCTAATAATGTTGGTATTGTTGCTATGGATATTTACTTCCCAAAACAATACG  
TTGATCAAGCTCAATTAGAAATTCACGATGGTGCTTCTACTGGTAAATACACTATTGG  
TTTAGGTCAAACCAGAATGGCTTTCTGTGATGATAGAGAAGATATTAAGTCTGTTTGT  
TTAACTGTTGTTAAGAGTTTAATGGAAAAGTACAACATTGATTACAACCAAGTTGGTG  
GATTAGAAGTCGGTACTGAAACTATTATTGATAAGTCTAAATCAGTCAAGTCTACTTT  
AATGCAACTTTTCGCTGAATCTGGAAATACTGATATTGAAGGTATTGATACCACTAAC  
GCTTGTTATGGTGGTACTAACGCTTTATTCAACACTGTAACTGGATGGAATCATCTGC  
TTGGGATGGTCGTTTCGGTTTAGTTGTTGCTGGTGATATTGCTGTTTACGCTTCCGGTA  
ATGCTAGACCAACCGGTGGTTGTGGTGTGTTGTGCTTTATTAATTGGTCCAAACGCTCC  
AATTGTTATGGAACAAGGTGTCAGAGCTACTCACATGGAAGATGTTTACGATTTCTAC  
AAGCCAAATCTTGCTTCTGAATTCACAGAAAGTCGATGGTCACTTATCTAACGTTTGT  
ACTTAAGATCTGTTGATATTTGTTACAACAGATACATTGAAAAGGTTCAAAAGCGTAC  
TGGTGAAAAGATTGATATTGAAACCGTTCCATACTTTGTCTTCCACACTCCATACTCTA  
AGTTAGTCCAAAAATCTTTCGCTAGATTAGCTTTCAACGATTTTATTAAGACCAAGA  
AAACCCAAAATACGCTGGTTTAGAAGAACACAAGGGTAAGACTTTAAGTGAACTT  
ACTATGATAAACCCTTGAAAAGGCTTTCATGGCTTACACTAAGGAAAAATTCCAAA  
AGCAAGTTATTCCATCATTATACATTCCAAAGAACTGTGGTAACATGTACTGTGGTTC  
TGTCTACAGTGCTTTAATTTCTTTAGTTTCTCAAATTCCATCTGAAGAATTATTAATA  
AGAGAATTGTTCTTCTCTTACGGTTCTGGTTTAGCCGCTTCTATGTACTCATTCAAG  
GTCATGAATTCTACTGCTGATATTGCTAAGACCTTAAATATTAAGGAAAGATTAGAAA  
GCAGAAATGAAGTCAAACCAGAAGAATTCGAAAAGATCATGTCTTTAAGAGAAAAG  
ACTTACCAACTTAAGGATTACACTCCAGTTAGTAAGACTGAAATGTTCCCAGGTACTT  
ACTATCTTAAGCACGTCGATGAAAAATTCCGCAGAACCTATGAAAGATATCAATAA

#### **Pi.HMGR**

ATGATGACGACAGTACCTATAGAAGTTAAAACACAAACAGAACAAAAAGTAAATAT  
TTGGTCTGGATTTTACAAAAAGGCTTTAAAAGAAAGACAAAATCAATTAAAATTAGC  
ATTTCCAAATCTTTTCCACCTACTTCACCACTTATATCTAAAGCTTCTTTTCTTCATTC  
ACCATCCTCAGGATCTGTATCAAATTTAACTGAATCAGCTTCAGATGTTTCAATTCAC  
CGTAATGAATCTACATCAGATTTAAGCAGTTTAGGTGTTTATGAAGAAAAGTTTCCAA

TTACTTCATTGGATGAACATATTGCTGATAATATGATTGAAAATTGTGTTGGTACTCTT  
GGATTGCCAGTTGGTGTGCTTTAAACTTCAATATTGATAGTAAACCAATTATAGTTCC  
AATGGCTATCGAAGAACCATCAGTAGTAGCAGCTGTTTCTGGTGCTGCCAAAACAGT  
AGCACAATTCGGTAAAGGAAAAACATTTTATACCAAACTTCTGAAAGAAATATTAC  
TTTTGCCCAAGTGGTTATTTTAGATATTCCGGATAATCGCTTAGATGAAAATGAGAAG  
AAGTTAAACGATATGAAAAATGAAATTATTACTTACGCTAATCAATATTGTCAAAAT  
ATGTATTCAAGGGGTGGTGGTGCTGTAATTTAGTAGTTCGTAGAGTTAAGAAGAAC  
GAAAGAAAAATTAGACCAAATCAAGTTGTTTTTGATTCTCCATCAAGTGAATGGTTAG  
TATGTCATTTTCATATTGATGTTTGTGATGCTATGGGTGCAAACGTGTGCTAGTACTGTT  
GCAGAAGGTGTCGCACCATTCCTTGCTGATTTAACAAATGGTCGTATTGGATTAAGAA  
TTGTATCCAATTTATGTACTGAAAGAATTGTTACTGCTTCTTTCAAAATTCCAGTTGAA  
AAAATGAAATACAAAAAATTCACTGGTGAACAAGTTTCAAGAGGTATTATAGAAGC  
ATATGAATTCGCTGAAGATGATGTTTACAGAGCTACTACCCATAATAAGGGTATTTTA  
AATGGTATCGATGCTGTTGCCTTAGCAACTGGTCAAGACTGGAGAGCTATTGAAGCT  
GCTGCACATGCTTATGCTGCTTCTGGTTCTAGTGTAAGTGTAAATGAACCAGTTAAAG  
GTCATTATAAATCTTTAACTAGTTATTGGATGGAAGAAGTTGAAGAAGAAGTAGATA  
ATCAAAAAACTAAACAACGTTACTTCTGTGGTGAATTAATTAACCAATTGCTGTTGG  
TACTAAGGGTGGTGTATTAAAAACAAATCCAGTTTATCATTACACTTTAGGTCTTATG  
GGTCATCCAGATTCTAAGGCTTTGTCAGCTATTTTTGCTTGTGTTGGTCTTGCTCAAAA  
CTTTGCTGCTGTTAGAGCTTTAACAACCTGAAGGTATTCAAAGAGGTCACATGTCTCTT  
CACGCTCGTAATATTGCTATTGCTGCAGGTGCTCCATCTCATGCTATTGCTGAAGTTAC  
TGATTATATGGTAGCATGCAATAGAATTAATTTAAATGCTGCCAAGGAATACTTATTA  
GCTCACGAATTACATAGTACTTTGAGAAAGCATTTAGAAGGTTCTGATTCCCAATCAT  
CAAAACCACCAAGTATGTTCTATTTTGAAGAATATGTTCCAGAAGGTGAAGATAAAA  
ACAATCGTATCACCTTAAACATTGCCTTCCAAACATTAAGTATCAACCAACTAATAT  
TGAATATCCAACCTGGATCAAATGATGATCCAATATCTCAACTTTTATTTGGTAATAAA  
GATTACACATGGATTTTCATCAATGCTTAATGTATTAGATAAATTCCAATTTAGTACAG  
CTTCTCAAGGACGTGCTAACTTTGTTTTAGCAAAAAAATTAAGTCTTATCAATGCT  
TATCAATATAATTACTACTAGATTAATGACTTACTATCCAAAACAACTACTCGTTTT  
ATTGAAAGAATCTTTAGACATTCAAAGAGACCAAAGTCAAGTACTTCATCATCCTTA  
AAAAGTAAAGTCAACAACCACCATCAATTGAAAAATATCTTTTAAGTATTCAAATT  
TCTGCTAATCAACAACCTTCAAACCAAAATATTCACTTACCTGGTCCAATTTCTGCTC  
ATTCTGTTCCAAGTAGCAATGGTTTATCTTGGTCTGTTCCAGATACTGGTATTTTCCGT  
AAGAATATTTTAGATATTGCAGATGATGTTAAAAATTTAAGTGATCCAACCTTAATTC  
AAGTAGGTTTCCATTATTATTGGCTTTATGGCAAGTTTTTGAATTAAGAGTAGTTCAA  
TGGGTTGGTCATTCTTCACTTTCATCATCACTTCTTGAAGAACAAGAAAAAGTTATAA  
GTTCAATTGTTTCTTACCAATTCCACCATACAAACCAAGTGAAGTCCGTCCACCAGT  
TATAATTAATAATACTGCAAAGGTTCAAGAACCACCTTATCTTAGTTCCTTCAACCGT  
TTCATTCCAATTTATTCAAAGAGATTCCAAGTTACAATGATTTTACTTTGTAATGCTAT  
ATCTTTTGATCCAACCTCTTATTAAGTCCCGTAGAATTAATTTCTTATTAACATTAGGTA  
GTTACTTAGAATGGGAATTAGCTAAGGATCATGATCTTGGTCGTCTAGGACGTGATCT  
TATGCTTGTTCAAAACCAAAATCAAAAAATTAGTCACGATGGTAGTATTGGTAATGGT  
ATCACAACTCATTATCATCTTTGGAAGGAAATGCGTGAAAAAACTAATCCAAAACAA

AATATGTTCCACTTTGAAGATGATGATGATACTGATGATTCTGCTAGTACCCCATCTA  
TATCTAATATAGTTGAATCTGTAGATAATGAACCATACTATCAACGTTATAATGATGA  
AATTAAACAATATTTATTAGAACTGATCATTCACAAATAAAATCACAATTATTTAAT  
ACTGAATCATGTCTTTTATTCTCAAAGGACGTTCTCGAAAATACTTAA

**Pi.atoB-opt**

ATGACTCTCCAGAAAGATGTGTATATTGTTTCCGCGGTGCGTACCCCAATCGGCGGAT  
TAAGCGGTTCTTTGGCCCAATTTAGTGCAACACAGCTTGGTAGCATTGCGATCAAAGG  
GGCTCTGGAAGAGGCCAATGTTAAGCCGGAGGAAGTTCAGGAAGTATTTTTCGGCAA  
TGTGCTGACGGCGAACCTGGGTCAAACCCGCGCGCTCAGGCAGCCCTGGGCGCGG  
GTATTCCAAACACTGTGGTTTGTACCACCGTGAACAAAGTTTTCGCTTCCGCAATGAA  
AGCCACAATCCTGGGCGCGCAGACGATTATCTTGGGTGAGAACGATCTGGTGGTAGT  
AGGGGGACAAGAATCTATGACTAACACACCGTACTATATCCCGAAAGCCCGCGCGG  
GCTGCCGTTACGGTAACCAGCAGATTGTGGACGGCATCATTACAGGATGGCCTTTACG  
ATGTGTACAACCAGTATCAAATGGGGGTTGCAGCTGACGCGACCGCCGCAGAATACA  
ATATCACGCGTAATGACCAGGATGATTTTCGCGATTTCGCAGCTATAAACTGTCCCAGG  
AATCCAATGCTAACGGTTATGTGGTTCGATGAAATCATTCCAGTAGAAATCCCGGCCA  
CTAAACGCACCCAGCGTCTACAGTGACGACCGATGACGAAATTAACCATCTTAACG  
AAGCCAAATTACGTGCAGTTCGCCCCGGCCTTTGTCACTGATGGCACAGTGACGGCGC  
CGAATGCTTCTACCATCAGCGATGGTGCAGCGGCCCTGGTCCTGGCGTCTAAAGAAA  
AAGTAGAGGCATTGGGCCTGAAGCCGATTGCTAAAATCATCGGGTGGGGCGATGCGG  
CCCATGACCCGGCACACTTCACTACCGCGCCATCTCTGGCTATCCCAAAGGCGCTGA  
AACATGCAAACAAAACGCAAGATGAGATTGACTTCTTTGAAATCAATGAGGCCTTCG  
CGGTGGTTTCCCTGGTGAACAGCAAAATTTTAAATATCCCGATTGAAAAATTGAATGT  
CTTTGGCGGTGCTTGCAGCATGGGCCACCCGCTGGGGTGTTCCGGTGCACGCATCATT  
GTTACACTGATCAACGTCTTGAAAAAAAAGGGCGGTAAACTGGGCTGCGCGGCCATC  
TGTAATGGTGGCGGCGGTGCCTCATCTGTCGTGATTGAAGTACTTAACCCGGATTAG

**Pi.HMGS-opt**

ATGAGCGGTATGAAAGCCGAGAATGTTGGCATCGTGGCGATGGACATCTACTTCCCG  
AAGCAGTACGTGGATCAAGCCCAACTGGAATCCATGATGGCGCCAGCACGGGCAA  
ATATACCATTGGTCTGGGCCAGACCCGCATGGCGTTCTGTGATGACCGTGAGGACAT  
CAACAGTGTGTGTCTGACGGTGGTGAAGAGTCTGATGGAAAAGTACAACATCGACTA  
TAACCAAGTTGGCCGTCTGGAAGTGGGCACCGAGACGATCATCGACAAGAGCAAGA  
GCGTGAAGAGCACGCTGATGCAGCTGTTTTCGGAAAGCGGTAACACCGACATCGAA  
GGCATCGACACCACCAACGCGTGCTACGGTGGCACGAACGCGCTGTTCAACACGGTG  
AACTGGATGGAAAGCAGTGCCTGGGATGGTCGCTTCGGTCTGGTGGTTGCGGGCGAT  
ATCGCCGTGTATGCCAGCGGTAATGCGCGCCCAACGGGTGGTTGCGGCGTTTGTGCG  
CTGCTGATCGGCCCCGAATGCGCCGATCGTTATGGAACAAGGCGTGCGCGCGACCCAC  
ATGGAGGATGTTTACGACTTCTACAAACCGAATCTGGCCAGCGAGTTTCCAGAAGTG  
GACGGCCATCTGAGCAATGTGTGCTATCTGCGCAGCGTGGACATCTGCTACAATCGCT  
ACATCGAGAAAGTGCAGAAGCGTACCGGCGAGAAGATCGATATCGAGACGGTGCCG  
TACTTCGTGTTTCATACGCCGTACAGCAAGCTGGTGCAGAAAAGCTTTGCCCGCCTCG  
CCTTTAACGACTTCATCAAGGATCAAGAAAACCCAAAATACGCGGGTCTGGAAGAA

CACAAAGGCAAGACCCTCAGCGAGACCTACTACGATAAGCCGCTGGAGAAAGCCTT  
CATGGCGTACACCAAGGAGAAGTTCCAGAAACAAGTTATTCCGAGTCTCTACATCCC  
GAAGAATTGCGGCAACATGTACTGCGGCAGCGTTTACAGCGCCCTCATCAGTCTGGT  
GAGCCAGATCCCGAGTGAAGAGCTGCTCAACAAGCGCATCGTGCTCTTCAGCTATGG  
TAGCGGTCTGGCGGCCAGCATGTACAGCTTCAAGGTGATGAACAGCACCGCCGACAT  
CGCGAAGACGCTCAACATCAAGGAACGTCTGGAGAGTCGCAACGAAGTTAAGCCGG  
AGGAGTTCGAGAAGATCATGAGTCTCCGCGAGAAGACCTACCAGCTCAAAGACTAC  
ACGCCGGTTAGCAAGACCGAGATGTTTCCGGGCACCTACTATCTGAAGCACGTTGAT  
GAGAAGTTCCGCGCACCTACGAACGTTACCAGTAA

**Pi.HMGR-opt**

ATGATGACGACAGTCCCGATCGAAGTTAAGAGCCAGACGGAACAAAAAGTAAACAT  
CTGGTCTGGTTTTTACAAAAAGCGCTGAAGGAACGCCAGAATCAGTTGAAACTGGC  
CTTTCCGAACCTATTCCCGCCGATTTCACTCATCAGCAAAACCTCCTTCCTTAATT  
CGCCGAGCCTGGGCTCACTGTCTAACCTGACGGAGAGCGCGTCCGATGTGTCAATTA  
ACCGTAATGAATCGACTTCCGATTTATCTTCCTTGGGTGTCCATGAAGAAAAATTTCC  
GATTACAAGCCTGGACGAGCACATCGCGGATAACATGATTGAAAACGTGTGTAGGCAC  
GCTCGGGCTGCCTGTTGGTGTGCACTGAATTTTAACATCGATAACAAATCAATTATT  
GTGCCGATGGCCATCGAAGAACCATCGGTGGTTGCAGCTGTAAGCGGCGCAGCCAA  
AACCGTGTCTCAATTCGGTAAAGGAAAAACCTTTTTTACCAAAACCTCCGAGCGTAA  
TATTACTTTTGCACAGGTCGTGATCCTGGACATTCCAGATGATAAATTGGACGAAAAC  
GAAAAGAAGCTGAATGATATGAAAAACGAAATCATTATCTTTGCCAATCAGTATTGC  
CAAAACATGTACTCTCGCGGCGGTGGCGTTGTCAATATGGTAGTGCGTCGGATTAAA  
AAGAACGAGCGCAAAGTACGCCCCAACCAGGTAGTTTTTGATAGCCAGTCCAGTGA  
ATGGTTAGTGTGTCAATTTCCACATCGACGTTTGCATGCAATGGGGGCGAATTGCGCT  
TCTACAGTGGCAGAAGGTGTTGCACCGTTCCTTGCCGATCTGACAAACGGCCGTATTG  
GACTGCGCATCGTGTCTAATCTGTGTACGGAAAGAATTGTCACCGCGTCGTTTAAGAT  
TCCTGTTGAGAAAAATGAAATACAAGAAATTTACAGGTGAACAAGTAAGCCGCGGCA  
TCATTGAGGCTTATGAATTTGCGGAAGACGATGTGTACCGCGCAACCACTCATAACA  
AAGGTATCCTGAACGGCATTGATGCCGTTGCTCTGGCAACCGGTCAGGACTGGCGCG  
CCATCGAGGCGGCGGCACACGCATACGCTGCGAGCGGCTCCAGTGAGACTGTGAAT  
GAACCGGTAAAGGGTCATTATAAATCATTAAACCAGTTACTGGATCGAGGAGATCGAA  
GAAGAGATCAACAACGAAAAGGTTAAACAGCGTTACTTCTGCGGGGAAATTAATAAT  
GCCATTGCGGTGGGTACAAAGGGCGGTGTCCTGAAAACCAACCCTGTTTATCACTA  
CACTCTGGGTCTAATGGGCAATCCAGATTCTAAAGCGCTGTCCGCTATTTTCGCCTGT  
GTGGGTTTGGCTCAAACTTTGCCGCAGTACGTGCGCTGACGACAGAAGGCATTTCAG  
CGCGGTCACATGAGCCTCCATGCTCGAAATATCGCCATTGCGGCGGGTGCTCCGAGC  
CACGCAATTGCGGAAGTCACTGATTATATGGTTGCATGCAACCGCATCAACCTGAATG  
CCGCGAAAGAGTACTTGTTAGCGCATGAACTGCACAGTACCCTGCGTAAACATCTGG  
ACGGCACCGATCCTCAGTCATCCAAACCGCCGAGTATGTTCTATTTTGAAGAATACAT  
TCCAGAGGGCGAAGATAAAAAACAACCGTATCACCTGAATATTGCCTTCCAAACCT  
GACTGACCAGCCAACAAACATCGAATATCCGACCGGAgcAATGACGATCCGGTTTCC  
CAGCTTTTATTTGGCAACAAGGACTACACTTGGATAACGTCGATGTTGAACGTTCTGG  
ATAAATTCCAGTTTAATACAGCGTCTCAAGGTCGTGCCAACCTCGTGCTGGCGAAAA

AACTGAAACTGCTGtcaATGCTTATTAACATAATTACCACTCGGTTAATGACGTATTAT  
CCAAAACAGACTGTTTCGTTTCATCGAACGCATCTTTCGTCACAGCAAACGCCCGAAG  
TCAACTTCTACATCCTCTGTAAAAACCAAAAATCAGCAGCCGCCGAGCATTGAGAAA  
TACCTTCTGAGTATTCAAATCTTTGCCAACCAGCATTTCGAGAATCAGAACATTCACT  
TGCCAGGCCCTATTAGCGCTCATTCTGTGCCGAGCAGTAGTGGTCTAAGCTGGTCTGT  
CCCGGATACCGGGATCTTCCGTAAGAATATCCTGGACATTGCGGATGATGTTAAAAA  
CTTAAGTGACCCGACGCTGATCCAAGTGGGCTTCCCACCTGCTGCTGGCTCTGTGGCAG  
GTTTTTGAAGTGCAGTCGTGCAGTGGGTGGCCACTCAAGCCTTTCTTCCAGCCTCCT  
TGAAGAACAACGCAAAGTGATTAGTTTCGATTGTAAGCTCACCTATCCCGCCGTATAA  
ACCGAGCGAGGTTCCGCCGCCGATTATCATCAATGGCAACTCTAAAGTGCAGGAACA  
ACCATATTTGAACAGCTTTAACCGTTTCGTTCCCATCTATTCCAAACGTTTCCAGGTGA  
CGATGATACTGCTCTGTAATGCGATCTCCTTTGATCCTACGCTTATTAAGTCTCGTCGG  
ATTAAATTCCTGCTGACACTGGGCAGTTACCTGGAATGGGAATTAGCTAAAGATCAT  
GACCTCGGTGCTGCTGGGACGTGACCTCATGTTGATCCAGAATTACAACAAAAAGGT  
AGCCATGATGGCTCTATTGGTAATGGGATCACAAACAGCTTTATTATCTGGAAAGAG  
ATGCGTGAAAAAACGAACCCGAAACAGAATATGTTCCACTTCGAAGACGATGAAGA  
TACAGACGATTCAATTAGCGTGAGCACACCTTCCATTTCTAACATCGTCGAAAGCGTT  
GACAATGAGTCGTACTATCAACGTTATAATGACGAAATCAAACAGTATCTGCTGGAA  
ACTGATCATTCTGAGATTAAATCGCAGCTGTTTAACACGGAGAGCTGCCTTCTGTTCT  
CCAAGGACGTGCTCGAAAACACTATTGAAGAGTACCAGAAGTATTACAATGTGAAA  
AACCTGCTGAACAACCTGAATACGAACTAA



Table S7 – Plasmids used in this study.

| <b><u>Name</u></b>                     | <b><u>Relevant Phenotype</u></b>                                                        | <b><u>Plasmid origin of replication</u></b> | <b><u>Source</u></b> |
|----------------------------------------|-----------------------------------------------------------------------------------------|---------------------------------------------|----------------------|
| pETM6-T7-mCherry                       | AmpR, lacO/I, P <sub>T7</sub> mCherry                                                   | ColE1 (pBR322)                              | Xu et al., 2012      |
| pETM6-H9-mCherry                       | AmpR, lacO/I, P <sub>H9</sub> mCherry                                                   | ColE1 (pBR322)                              | Jones et al., 2015b  |
| pETM6-C4-mCherry                       | AmpR, lacO/I, P <sub>CA</sub> mCherry                                                   | ColE1 (pBR322)                              | Jones et al., 2015b  |
| pMevT                                  | AmpR, lacO/I, P <sub>lac</sub> -Ec.atoB-Sc.HMGS-Sc.HMGR                                 | p15a                                        | Martin et al, 2003   |
| pETM6-T7-Ec.atoB                       | AmpR, lacO/I, P <sub>T7</sub> Ec.atoB                                                   | ColE1 (pBR322)                              | This Study           |
| pETM6-H9-Ec.atoB                       | AmpR, lacO/I, P <sub>H9</sub> Ec.atoB                                                   | ColE1 (pBR322)                              | This Study           |
| pETM6-T7-Sc.HMGS                       | AmpR, lacO/I, P <sub>T7</sub> Sc.HMGS                                                   | ColE1 (pBR322)                              | This Study           |
| pETM6-C4-Sc.HMGS                       | AmpR, lacO/I, P <sub>C4</sub> Sc.HMGS                                                   | ColE1 (pBR322)                              | This Study           |
| pETM6-T7-Sc.HMGR                       | AmpR, lacO/I, P <sub>T7</sub> Sc.HMGR                                                   | ColE1 (pBR322)                              | This Study           |
| pETM6-H9-Sc.HMGR                       | AmpR, lacO/I, P <sub>H9</sub> Sc.HMGR                                                   | ColE1 (pBR322)                              | This Study           |
| pETM6-H9-Ec.atoB_C4-Sc.HMGS            | AmpR, lacO/I, P <sub>H9</sub> Ec.atoB, P <sub>C4</sub> Sc.HMGS                          | ColE1 (pBR322)                              | This Study           |
| pETM6-H9-Ec.atoB_C4-Sc.HMGS_H9-Sc.HMGR | AmpR, lacO/I, P <sub>H9</sub> Ec.atoB, P <sub>C4</sub> Sc.HMGS, P <sub>H9</sub> Sc.HMGR | ColE1 (pBR322)                              | This Study           |
| pETM6-H9-Ec.atoB_C4-Sc.HMGS_H9-Pi.HMGR | AmpR, lacO/I, P <sub>H9</sub> Ec.atoB, P <sub>C4</sub> Sc.HMGS, P <sub>H9</sub> Pi.HMGR | ColE1 (pBR322)                              | This Study           |
| pETM6-T7-Pi.atoB                       | AmpR, lacO/I, P <sub>T7</sub> Pi.atoB                                                   | ColE1 (pBR322)                              | This Study           |
| pETM6-H9-Pi.atoB                       | AmpR, lacO/I, P <sub>H9</sub> Pi.atoB                                                   | ColE1 (pBR322)                              | This Study           |
| pETM6-T7-Pi.HMGS                       | AmpR, lacO/I, P <sub>T7</sub> Pi.HMGS                                                   | ColE1 (pBR322)                              | This Study           |
| pETM6-C4-Pi.HMGS                       | AmpR, lacO/I, P <sub>C4</sub> Pi.HMGS                                                   | ColE1 (pBR322)                              | This Study           |

|                                                    |                                                                                                 |                |            |
|----------------------------------------------------|-------------------------------------------------------------------------------------------------|----------------|------------|
| pETM6-T7-Pi.HMGR                                   | AmpR, lacO/I, P <sub>T7</sub> Pi.HMGR                                                           | ColE1 (pBR322) | This Study |
| pETM6-H9-Pi.HMGR                                   | AmpR, lacO/I, P <sub>H9</sub> Pi.HMGR                                                           | ColE1 (pBR322) | This Study |
| pETM6-T7-9-AGF_T7-10-AGF                           | AmpR, lacO/I, P <sub>T7</sub> Pi.atoB, P <sub>T7</sub> Pi.HMGS                                  | ColE1 (pBR322) | This Study |
| pETM6-H9-9-AGF_T7-10-AGF                           | AmpR, lacO/I, P <sub>H9</sub> Pi.atoB, P <sub>T7</sub> Pi.HMGS                                  | ColE1 (pBR322) | This Study |
| pETM6-T7-9-AGF_T7-10-AGF_T7-88-AGF                 | AmpR, lacO/I, P <sub>T7</sub> Pi.atoB, P <sub>T7</sub> Pi.HMGS, P <sub>T7</sub> Pi.HMGR         | ColE1 (pBR322) | This Study |
| pETM6-H9-9-AGF_T7-10-AGF_H9-88-AGF                 | AmpR, lacO/I, P <sub>H9</sub> Pi.atoB, P <sub>T7</sub> Pi.HMGS, P <sub>H9</sub> Pi.HMGR         | ColE1 (pBR322) | This Study |
| pETM6-T7-Pi.atoB-opt                               | AmpR, lacO/I, P <sub>T7</sub> Pi.atoB-opt                                                       | ColE1 (pBR322) | This Study |
| pETM6-H9-Pi.atoB-opt                               | AmpR, lacO/I, P <sub>H9</sub> Pi.atoB-opt                                                       | ColE1 (pBR322) | This Study |
| pETM6-T7-Pi.HMGS-opt                               | AmpR, lacO/I, P <sub>T7</sub> Pi.HMGS-opt                                                       | ColE1 (pBR322) | This Study |
| pETM6-C4-Pi.HMGS-opt                               | AmpR, lacO/I, P <sub>C4</sub> Pi.HMGS-opt                                                       | ColE1 (pBR322) | This Study |
| pETM6-T7-Pi.HMGR-opt                               | AmpR, lacO/I, P <sub>T7</sub> Pi.HMGR-opt                                                       | ColE1 (pBR322) | This Study |
| pETM6-H9-Pi.HMGR-opt                               | AmpR, lacO/I, P <sub>H9</sub> Pi.HMGR-opt                                                       | ColE1 (pBR322) | This Study |
| pETM6-H9-Ec.atoB_C4-Sc.HMGS_H9-Pi.HMGR-opt         | AmpR, lacO/I, P <sub>H9</sub> Ec.atoB, P <sub>C4</sub> Sc.HMGS, P <sub>H9</sub> Pi.HMGR-opt     | ColE1 (pBR322) | This Study |
| pETM6-H9-Pi.atoB-opt_C4-Pi.HMGS-opt_H9-Sc.HMGR     | AmpR, lacO/I, P <sub>H9</sub> Pi.atoB, P <sub>C4</sub> Pi.HMGS, P <sub>H9</sub> Sc.HMGR-opt     | ColE1 (pBR322) | This Study |
| pETM6-H9-Pi.atoB-opt_C4-Pi.HMGS-opt_H9-Pi.HMGR-opt | AmpR, lacO/I, P <sub>H9</sub> Pi.atoB, P <sub>C4</sub> Pi.HMGS, P <sub>H9</sub> Pi.HMGR-opt     | ColE1 (pBR322) | This Study |
| pETM6-H9-Ec.atoB_C4-Pi.HMGS-opt_H9-Sc.HMGR         | AmpR, lacO/I, P <sub>H9</sub> Ec.atoB, P <sub>C4</sub> Pi.HMGS-opt, P <sub>H9</sub> Sc.HMGR     | ColE1 (pBR322) | This Study |
| pETM6-H9-Ec.atoB_C4-Pi.HMGS-opt_H9-Pi.HMGR-opt     | AmpR, lacO/I, P <sub>H9</sub> Ec.atoB, P <sub>C4</sub> Pi.HMGS-opt, P <sub>H9</sub> Pi.HMGR-opt | ColE1 (pBR322) | This Study |
| pETM6-H9-Pi.atoB-opt_C4-Sc.HMGS_H9-Sc.HMGR         | AmpR, lacO/I, P <sub>H9</sub> Pi.atoB-opt, P <sub>C4</sub> Sc.HMGS, P <sub>H9</sub> Sc.HMGR     | ColE1 (pBR322) | This Study |
| pETM6-H9-Pi.atoB-opt_C4-Sc.HMGS_H9-Pi.HMGR-opt     | AmpR, lacO/I, P <sub>H9</sub> Pi.atoB-opt, P <sub>C4</sub> Sc.HMGS, P <sub>H9</sub> Pi.HMGR-opt | ColE1 (pBR322) | This Study |
